# Supplementary material for: Genetic Diversity of Apple Clonal Rootstocks from the Collection of the Michurinsk State Agrarian University Based on SSR Markers
Source: MDPI journal article supplement (doi:10.3390/plants12162991), 2023-08-19
Supplement: s1 [file s1]

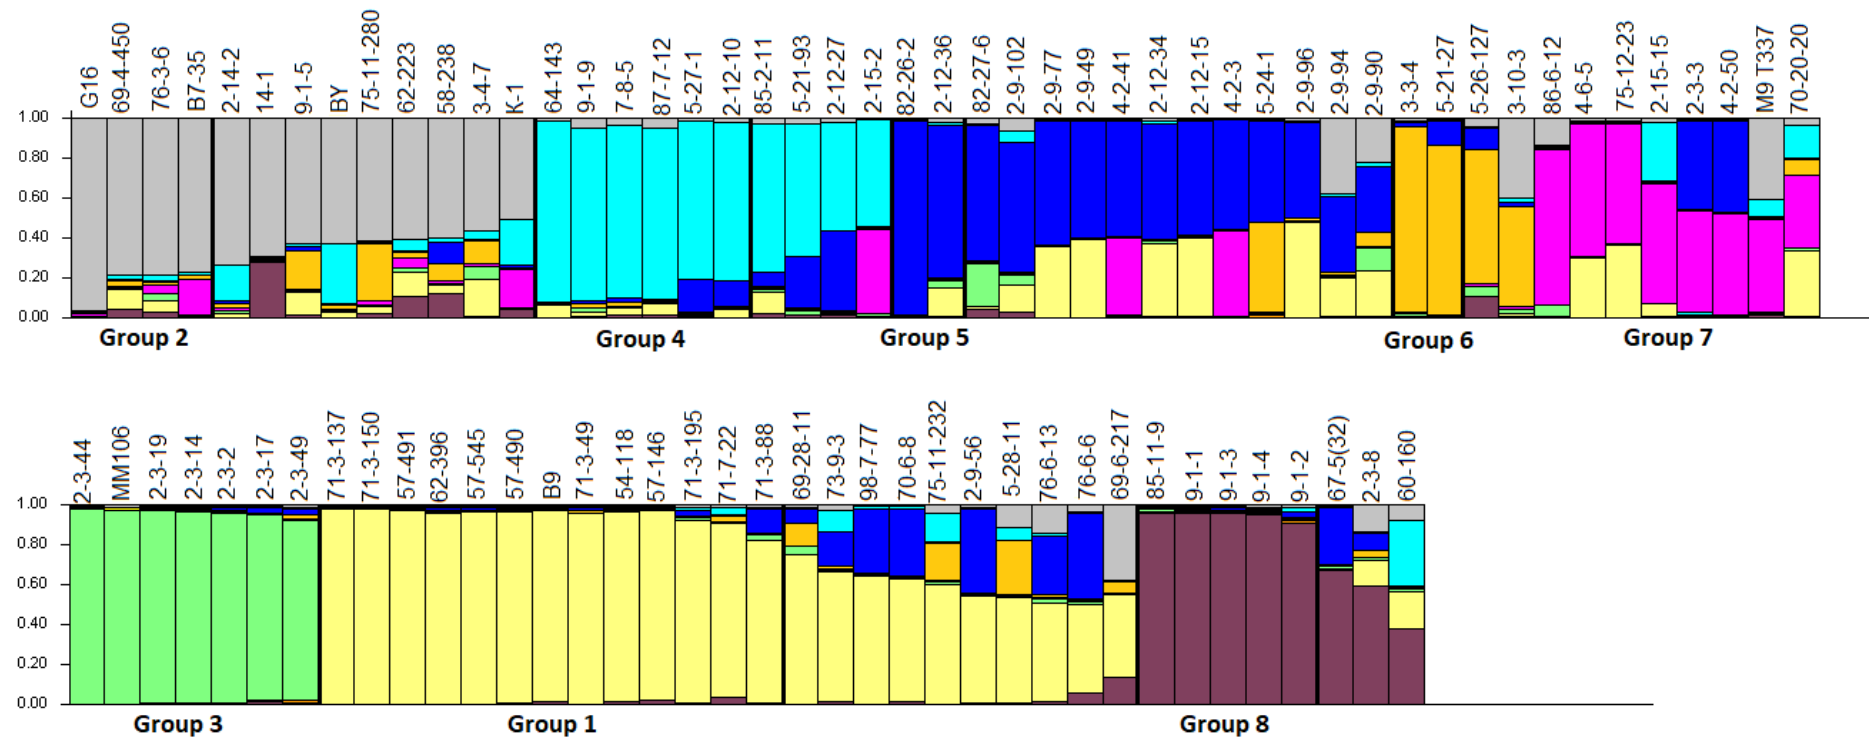

**Figure S1.** Probability of apple rootstock accession assignment to one of the groups. Each accession is represented by a vertical bar partitioned into K = 8 segments.

**Table S1.** Assignment of the studied apple rootstock accessions to the cluster on the dendrogram and to the group (K = 2 and K = 8) defined by Structure (assignment probability  $\geq 80\%$ ). The color of the cells corresponds to the color of the Structure group on the graphs (Figure 3, Figure S1).

| №  | Accession                                           | Parentage                         | Cluster/<br>Subcluster | k=2  | k=8  |
|----|-----------------------------------------------------|-----------------------------------|------------------------|------|------|
| 1  | Budagovsky 9 (Paradizka Budagovskogo, PB, B9, Bud9) | M8 × Krasniy Shtandart (Red Flag) | 5                      | 1    | 1    |
| 2  | 54-118                                              | B9 × 13-14                        | 5                      | 1    | 1    |
| 3  | 57-146                                              | B9 open pollination               | 5                      | 1    | 1    |
| 4  | 57-490                                              | B9 × 13-14                        | 5                      | 1    | 1    |
| 5  | 57-491                                              | B9 × 13-14                        | 5                      | 1    | 1    |
| 6  | 57-545                                              | B9 × 13-14                        | 5                      | 1    | 1    |
| 7  | 58-238                                              | B9 × Naliv Aliy                   | 5                      | admx | admx |
| 8  | 60-160                                              | B9 × 49-290                       | 5                      | admx | admx |
| 9  | 62-223                                              | Anoka × B9                        | 5                      | admx | admx |
| 10 | 62-396 (B10)                                        | 13-14 × B9                        | 5                      | 1    | 1    |
| 11 | 64-143                                              | B9 × 57-290                       | 5                      | admx | 4    |
| 12 | 67-5(32)                                            | 54-83 open pollination            | 5                      | 1    | admx |
| 13 | 69-4-450                                            | B9 × <i>M. niedzwetzkyana</i>     | 5                      | admx | 2    |
| 14 | 69-6-217                                            | B9 × Kitayka Rozovaya             | 5                      | admx | admx |
| 15 | 69-28-11                                            | 58-257 × B9                       | 5                      | 1    | admx |
| 16 | 70-6-8                                              | 54-83 × 57-344                    | 5                      | 1    | admx |
| 17 | 70-20-20                                            | 57-469 × 57-344                   | 4/1                    | admx | admx |
| 18 | 71-3-49                                             | 58-257 × B9                       | 5                      | 1    | 1    |
| 19 | 71-3-88                                             | 58-257 × B9                       | 5                      | 1    | 1    |
| 20 | 71-3-137                                            | 58-257 × B9                       | 5                      | 1    | 1    |
| 21 | 71-3-150                                            | 58-257 × B9                       | 5                      | 1    | 1    |
| 22 | 71-3-195                                            | 58-257 × B9                       | 5                      | 1    | 1    |
| 23 | 71-7-22                                             | 57-531 × 57-233                   | 5                      | 1    | 1    |
| 24 | 73-9-3                                              | 57-545 × 57-366                   | 5                      | 1    | admx |
| 25 | 75-11-232                                           | B9 open pollination               | 5                      | admx | admx |
| 26 | 75-11-280                                           | B9 open pollination               | 5                      | 2    | admx |
| 27 | 75-12-23                                            | A2 open pollination               | 4/1                    | 2    | admx |
| 28 | 76-3-6                                              | M27 × B9                          | 5                      | 2    | 2    |
| 29 | Malysh Budagovskogo (MB, 76-6-6)                    | 57-344 × 57-490                   | 5                      | 1    | admx |
| 30 | 76-6-13                                             | 57-344 × 57-490                   | 5                      | 1    | admx |
| 31 | 82-26-2                                             | -                                 | 5                      | 1    | 5    |
| 32 | 82-27-6                                             | -                                 | 5                      | admx | admx |
| 33 | 85-2-11                                             | 3-4-98 × 54-118                   | 5                      | admx | admx |
| 34 | 85-11-9                                             | 70-5-10 × 54-118                  | 5                      | 2    | 8    |
| 35 | 86-6-12                                             | -                                 | 4/1                    | 2    | admx |
| 36 | 87-7-12                                             | 54-118 × B9                       | 5                      | 2    | 4    |
| 37 | 98-7-77                                             | 62-396 × 58-199                   | 5                      | 1    | admx |
| 38 | 2-3-2                                               | 82-27-6 open pollination          | 4/2                    | 2    | 3    |
| 39 | 2-3-3                                               | 82-27-6 open pollination          | 5                      | 2    | admx |
| 40 | 2-3-8                                               | 82-27-6 open pollination          | 5                      | admx | admx |
| 41 | 2-3-14                                              | 82-27-6 open pollination          | 4/2                    | 2    | 3    |
| 42 | 2-3-17                                              | 82-27-6 open pollination          | 4/2                    | 2    | 3    |
| 43 | 2-3-19                                              | 82-27-6 open pollination          | 4/2                    | 2    | 3    |
| 44 | 2-3-44                                              | 82-27-6 open pollination          | 4/2                    | 2    | 3    |

|    |                            |                                      |     |      |      |
|----|----------------------------|--------------------------------------|-----|------|------|
| 45 | 2-3-49                     | 82-27-6 open pollination             | 4/2 | 2    | 3    |
| 46 | 2-9-49                     | 82-26-2 open pollination             | 5   | 1    | admx |
| 47 | 2-9-56                     | 82-26-2 open pollination             | 5   | 1    | admx |
| 48 | 2-9-77                     | 82-26-2 open pollination             | 5   | 1    | admx |
| 49 | 2-9-90                     | 82-26-2 open pollination             | 5   | admx | admx |
| 50 | 2-9-94                     | 82-26-2 open pollination             | 5   | admx | admx |
| 51 | 2-9-96                     | 82-26-2 open pollination             | 5   | 1    | admx |
| 52 | 2-9-102                    | 82-26-2 open pollination             | 5   | 1    | admx |
| 53 | 2-12-10                    | 82-11-5 open pollination             | 5   | admx | 4    |
| 54 | 2-12-15                    | 82-11-5 open pollination             | 5   | 1    | admx |
| 55 | 2-12-27                    | 82-11-5 open pollination             | 5   | admx | admx |
| 56 | 2-12-34                    | 82-11-5 open pollination             | 5   | 1    | admx |
| 57 | 2-12-36                    | 82-11-5 open pollination             | 5   | 1    | 5    |
| 58 | 2-14-2                     | 82-26-52 × 60-160                    | 5   | 2    | admx |
| 59 | 2-15-2                     | 85-8-12 open pollination             | 4/1 | 2    | admx |
| 60 | 2-15-15                    | 85-8-12 open pollination             | 4/1 | 2    | admx |
| 61 | 3-3-4                      | 85-6-5 × Spartan                     | 3   | 2    | 6    |
| 62 | 3-4-7                      | 62-396 open pollination              | 5   | admx | admx |
| 63 | 3-10-3                     | 82-11-2 × Wealthy                    | 5   | 2    | admx |
| 64 | 4-2-3                      | 82-52-6 × 82-26-2                    | 5   | 2    | admx |
| 65 | 4-2-41                     | 82-52-6 × 82-26-2                    | 5   | 2    | admx |
| 66 | 4-2-50                     | 82-52-6 × 82-26-2                    | 5   | 2    | admx |
| 67 | 4-6-5                      | 83-11-10 open pollination            | 4/1 | 2    | admx |
| 68 | 5-21-27                    | 82-27-6 × Zhigulevskoe               | 3   | 2    | 6    |
| 69 | 5-21-93                    | 82-27-6 × Zhigulevskoe               | 5   | 2    | admx |
| 70 | 5-24-1                     | 82-26-2 × Orlik                      | 5   | admx | admx |
| 71 | 5-26-127                   | -                                    | 3   | 2    | admx |
| 72 | 5-27-1                     | Zhigulevskoe × 82-26-2               | 5   | 2    | 4    |
| 73 | 5-28-11                    | 82-57-8 × <i>M. baccata</i>          | 5   | admx | admx |
| 74 | 9-1-1                      | 57-157 × Stroeviskoe                 | 5   | admx | 8    |
| 75 | 9-1-2                      | 57-157 × Stroeviskoe                 | 5   | 1    | 8    |
| 76 | 9-1-3                      | 57-157 × Stroeviskoe                 | 5   | admx | 8    |
| 77 | 9-1-4                      | 57-157 × Stroeviskoe                 | 5   | admx | 8    |
| 78 | 9-1-5                      | 57-157 × Stroeviskoe                 | 5   | admx | admx |
| 79 | 9-1-9                      | 57-157 × Stroeviskoe                 | 5   | admx | 4    |
| 80 | 14-1                       | <i>M. sieboldii</i> open pollination | 1   | 2    | admx |
| 81 | Babarabskaya yablonya (BY) | <i>M. turkmenorum</i>                | 5   | 2    | admx |
| 82 | M9 T337                    | M9 clone                             | 4/1 | 2    | admx |
| 83 | MM106                      | M1 × Northern Spy                    | 4/2 | 2    | 3    |
| 84 | G16                        | Ottawa 3 × <i>M. floribunda</i>      | 1   | 2    | 2    |
| 85 | K-1                        | Borovinka × M9                       | 4/1 | 2    | admx |
| 86 | B7-35                      | M4 × M9                              | 2   | 2    | 2    |
| 87 | 7-8-5 (Ural-5)             | 57-469 open pollination              | 5   | 2    | 4    |
